# Supplementary material for: Dietary Intervention Reverses Fatty Liver and Altered Gut Microbiota during Early-Life Undernutrition
Source: PubMed Central journal article supplement (PMC7483509; doi:10.1128/msystems.00499-20), 2020-09-08
Supplement: mSystems.00499-20-s0001.pdf [file mSystems.00499-20-s0001.pdf]

# Microbiome\_Metabolomics

Kylynda C. Bauer

2020-04-03

## Contents

|                                       |   |
|---------------------------------------|---|
| RCode_MICROBIOME_WGCNA                | 1 |
| Microbiome_Alpha_Beta_Tests . . . . . | 2 |
| WGCNA . . . . .                       | 4 |

```
library(knitr)
```

```
## Warning: package 'knitr' was built under R version 3.5.2
```

```
opts_chunk$set(tidy.opts=list(width.cutoff=60),tidy=TRUE)
```

## RCode\_MICROBIOME\_WGCNA

### RPackages\_Set Working Directory

```
library(corrplot)
library(dplyr)
library(phyloseq)
library(psych)
library(qiime2R)
library(tibble)
library(tidyr)
library(tidyverse)
library(WGCNA)
#### Important to add..
options(stringsAsFactors = FALSE)
allowWGCNAThreads()
```

### Pipeline Sources

#### MICROBIOME:

<https://forum.qiime2.org/t/tutorial-integrating-qiime2-and-r-for-data-visualization-and-analysis-using-qiime2r/4121/19>

WGCNA:

<https://horvath.genetics.ucla.edu/html/CoexpressionNetwork/Rpackages/WGCNA/Tutorials/>

## Microbiome\_Alpha\_Beta\_Tests

Mouse Age Week 11 (Week 8 of experiment) reported here, Week 7 analyses performed with identical code, but Week 7-specific files

### Data Input from Microbiome Analyses

```
# Bring in Metadata
metadata <- read_tsv("Metadata8_NAMES.txt")
```

```
## Parsed with column specification:
## cols(
##   `#SampleID` = col_character(),
##   Time_Week = col_double(),
##   Group = col_character(),
##   `Starting Diet` = col_character(),
##   Ending_Diet = col_character(),
##   Cage = col_character()
## )
```

```
metadata
```

```
# Bring in table data from QIIME2 analyses
SVs <- read_qza("8-filtered-table.qza")
names(SVs) #information about the object
SVs$uuid
SVs$data[1:5, 1:5]
```

```
# Bring in taxonomy from QIIME2 analyses
taxonomy <- read_qza("taxonomy.qza")
# convert the table into a tabular split version
taxtable <- taxonomy$data %>% as.tibble() %>% separate(Taxon,
  sep = "; ", c("Kingdom", "Phylum", "Class", "Order", "Family",
  "Genus", "Species"))
```

```
## Warning: `as.tibble()` is deprecated, use `as_tibble()` (but mind the new semantics).
## This warning is displayed once per session.
```

```
## Warning: Expected 7 pieces. Missing pieces filled with `NA` in 713 rows [11, 18,
## 32, 33, 38, 42, 49, 55, 56, 59, 66, 69, 71, 73, 77, 81, 83, 84, 90, 99, ...].
```

```
head(taxtable)
```

```
# Bring in rooted tree from QIIME2 analyses
```

```

tree <- read_qza("rooted-tree.qza")
tree$uuid
tree$data

### Alpha Diversity Beta Diversity from QIMME2 analyses
### (additional analyses can be completed e.g.
### Shannon/Bray-Curtis etc.)
faithpd <- read_qza("faith_pd_vector.qza")
faithpd$uuid

pco1w8 <- read_qza("unweighted_unifrac_pcoa_results.qza")
pco1w8$uuid
head(pco1w8$data$ProportionExplained)
pco1w8$data$Vectors[1:5, 1:3]

```

## Visualization for Microbiome Analyses

```

UUPlay1w8 <- pco1w8$data$Vectors %>%
  rename("#SampleID"=SampleID) %>% #rename to match the metadata table
  left_join(metadata) %>%
  left_join(faithpd$data %>% rownames_to_column("#SampleID")) %>%
  ggplot(aes(x=PC1, y=PC2, color=Group, size=faith_pd, shape=Ending_Diet)) +
  geom_point() +
  xlab(paste("Principal Component 1:", round(100*pco1w8$data$ProportionExplained[1],
                                           digits = 1), "%")) +
  ylab(paste("Principal Component 2:", round(100*pco1w8$data$ProportionExplained[2],
                                           digits = 1), "%")) +
  theme_bw() +
  ggtitle("Unweighted UniFrac")

```

```

## Joining, by = "#SampleID"
## Joining, by = "#SampleID"

```

```

UUPlay1w8 + scale_size_continuous(range=c(4,8)) +
  scale_color_manual(limits = c("CON", "C-MBG", "MBG", "MBG-R"),
                    values=c("black", "grey", "deeppink3", "deeppink4")) +
  theme(title = element_text(size=18, face = "bold"),
        axis.title.x = element_text(size = 16),
        axis.title.y = element_text(size = 16), legend.text = element_text(size = 16)) +
  guides(colour = guide_legend(override.aes = list(size=5))) +
  guides(shape = guide_legend(override.aes = list(size=5)))

```

### *#Further Aesthetics Code*

```

UUPlay2w8 <- UUPlay1w8 + scale_size_continuous(range=c(4,8)) +
  scale_color_manual(limits = c("CON", "C-MBG", "MBG", "MBG-R"),
                    values=c("black", "grey", "deeppink3", "deeppink4")) +
  theme(title = element_text(size=18, face = "bold"),
        axis.title.x = element_text(size = 16),
        axis.title.y = element_text(size = 16), legend.text = element_text(size = 16)) +
  guides(colour = guide_legend(override.aes = list(size=5))) +
  guides(shape = guide_legend(override.aes = list(size=5)))

```

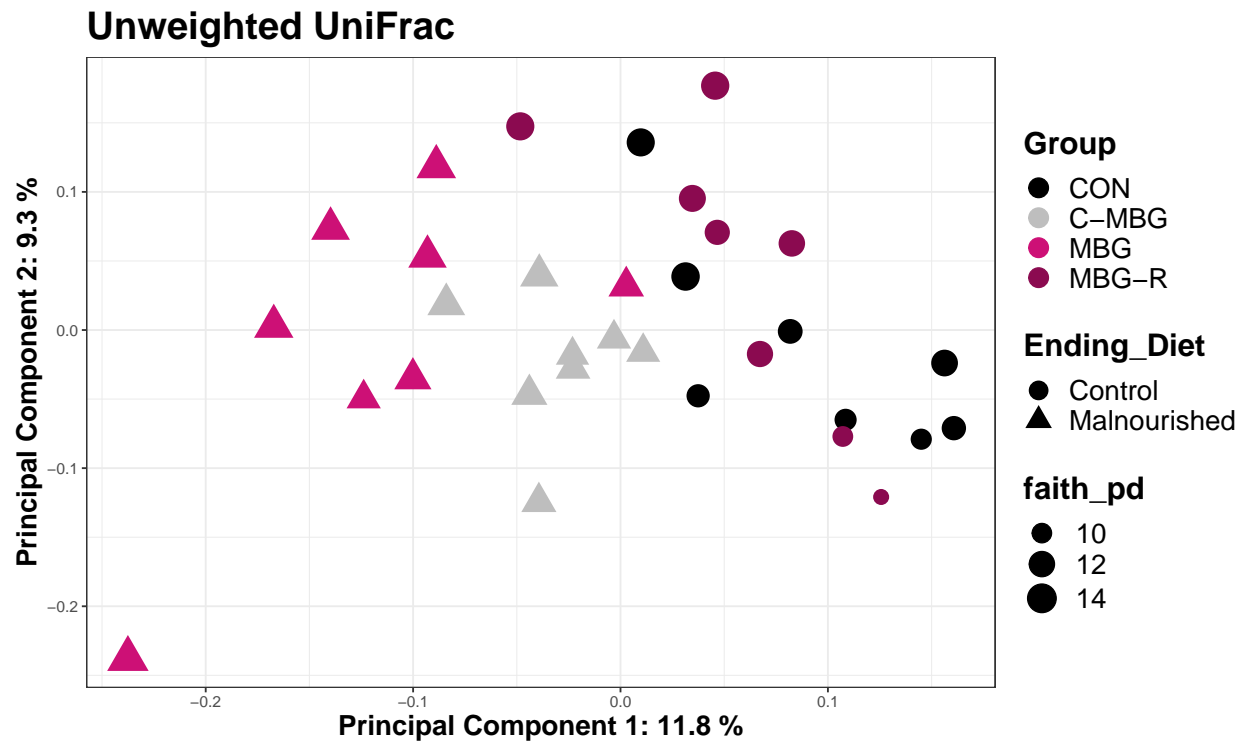

## WGCNA

Showing correlation for clinical/group traits, you can change input depending on correlation (e.g. same code different input for PICRUSt)

## Metabolomics Input Data

```
# Import normalized data from
# metaboAnalyst_Liver_less-polar_positive / Transpose_samples
# in rows and metabolites in columns
Metdata <- read.csv("normalizedMetabolomics43.csv", check.names = FALSE)
Metdata <- data.frame(Metdata[, -1], row.names = Metdata[, 1],
  check.names = FALSE)
Metdata <- data.frame(t(Metdata), check.names = FALSE)
head(Metdata)
dim(Metdata)
is.data.frame(Metdata)

# Checking that the data frame contains only numeric values.
sapply(Metdata, is.numeric)
Metdata <- data.frame(sapply(Metdata, as.numeric), check.names = FALSE,
  row.names = rownames(Metdata))
```

```
# Checking for missing values, if TRUE no missing data  
gsg = goodSamplesGenes(Metdata, verbose = 3)
```

```
## Flagging genes and samples with too many missing values...  
## ..step 1
```

```
gsg$allOK
```

```
## [1] TRUE
```

## Check for Outliers

All samples were kept based on sampleTree and earlier Metabolomics PCA (in text)

```
sampleTree = hclust(dist(Metdata), method = "average")  
par(cex = 0.6)  
par(mar = c(0, 4, 2, 0))  
plot(sampleTree, main = "Sample clustering to detect outliers",  
      sub = "", xlab = "", cex.lab = 1.5, cex.axis = 1.5, cex.main = 2)
```

## Sample clustering to detect outliers

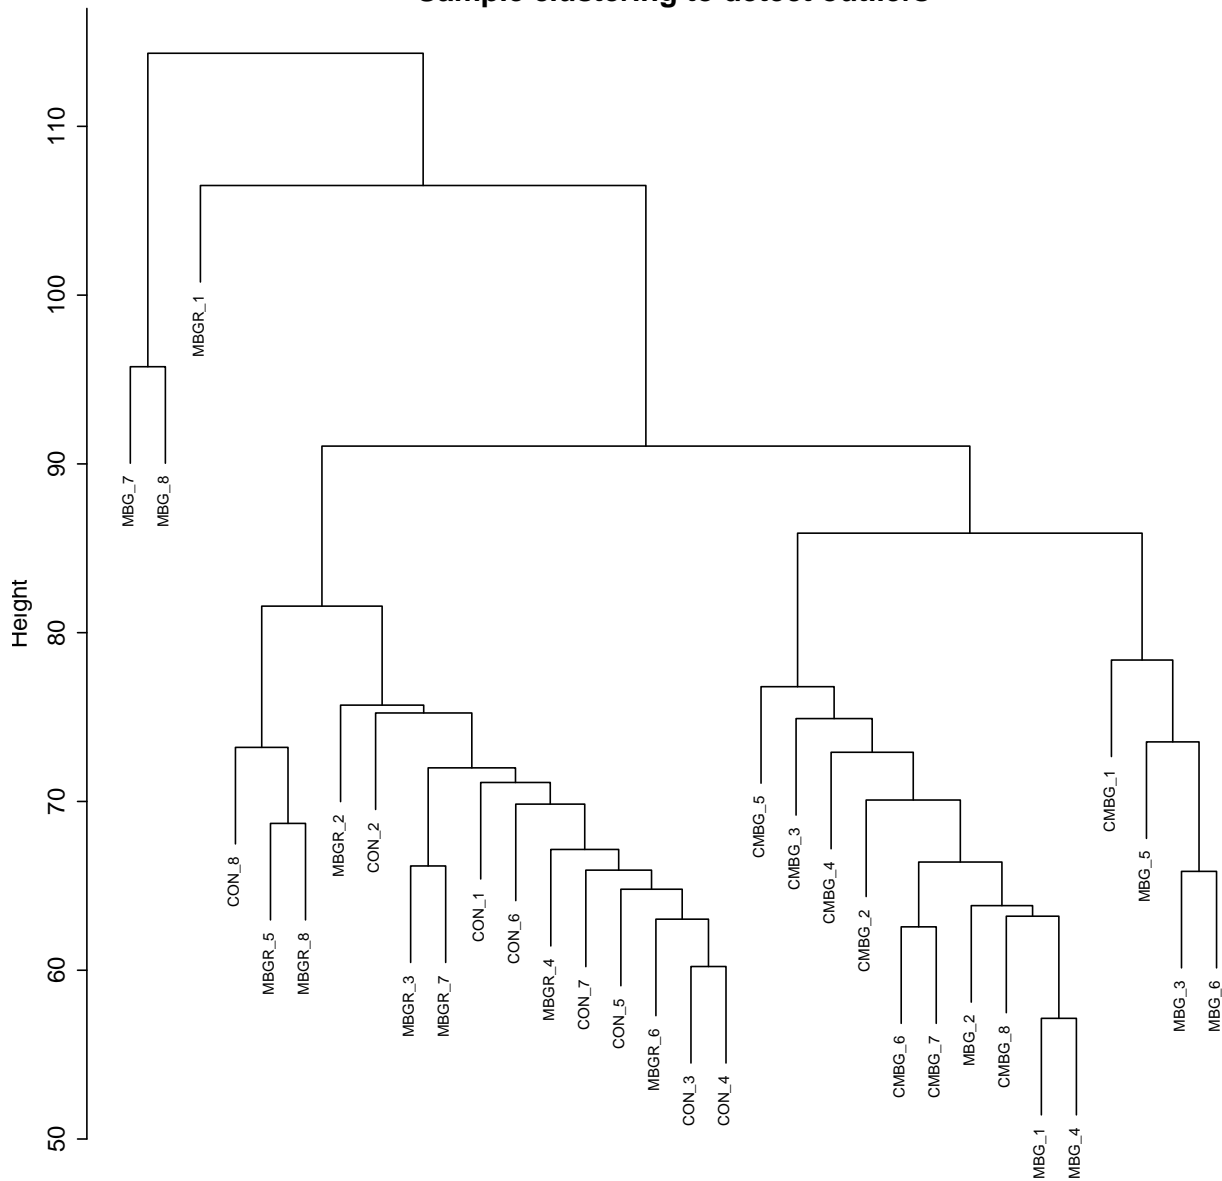

### Clinical/Group (Binarize) Input

```
# Loading clinical trait data
MetTraits = read.csv("Metadata_M.csv", check.names = FALSE)
head(MetTraits)
MetTraits <- data.frame(MetTraits, check.names = FALSE)

# rder groups and binarize (Healthy, Malnourished), to make
# pairwise analyses
MetTraits$Groups = factor(MetTraits$Groups, levels = c("CON",
  "C-MBG", "MBG", "MBG-R"))
MetTraits$`Start Diet` = factor(MetTraits$`Start Diet`, levels = c("Healthy",
```

```

"Malnourished"))
MetTraits$`Final Diet` = factor(MetTraits$`Final Diet`, levels = c("Healthy",
"Malnourished"))

bin1 = binarizeCategoricalColumns(MetTraits$Groups, includePairwise = TRUE,
includeLevelVsAll = FALSE)
bin2 = binarizeCategoricalColumns(MetTraits$`Start Diet`, includePairwise = TRUE,
includeLevelVsAll = FALSE)
bin3 = binarizeCategoricalColumns(MetTraits$`Final Diet`, includePairwise = TRUE,
includeLevelVsAll = FALSE)

# creating new trait data file for group traits
groupTraits <- data.frame(MetTraits$Sample_ID, bin1$`data.C-MBG.vs.CON`,
bin1$`data.MBG.vs.CON`, bin1$`data.MBG-R.vs.CON`, bin1$`data.MBG-R.vs.MBG`,
bin1$`data.MBG.vs.C-MBG`, bin2$`data.Malnourished.vs.Healthy`,
bin3$`data.Malnourished.vs.Healthy`)
names(groupTraits) <- c("Sample_ID", "C-MBGvCON", "MBGvCON",
"MBG-RvCON", "MBG-RvMBG", "MBGvC-MBG", "Start_Mal_Diet",
"End_Mal_Diet")
groupTraits <- column_to_rownames(groupTraits, "Sample_ID")
head(groupTraits)

# Now for the non-binarized, continuous data
dataTraits = read.csv("Metadata_M.csv", check.names = FALSE)
dataTraits1 <- data.frame(dataTraits[, -1], row.names = dataTraits[,
1], check.names = FALSE)
dataTraits2 <- dataTraits[, -c(1:5)]
head(dataTraits2)

# Sample dendrogram tree with group trait (binarized table)
sampleTree2 = hclust(dist(Metdata), method = "average")
# Convert traits to a color representation: white means low,
# red means high, grey means missing entry
traitColors = numbers2colors(groupTraits, signed = FALSE)
# Plot the sample dendrogram and the colors underneath.
plotDendroAndColors(sampleTree2, traitColors, groupLabels = names(groupTraits),
main = "Sample dendrogram and group heatmap")

```

### Sample dendrogram and group heatmap

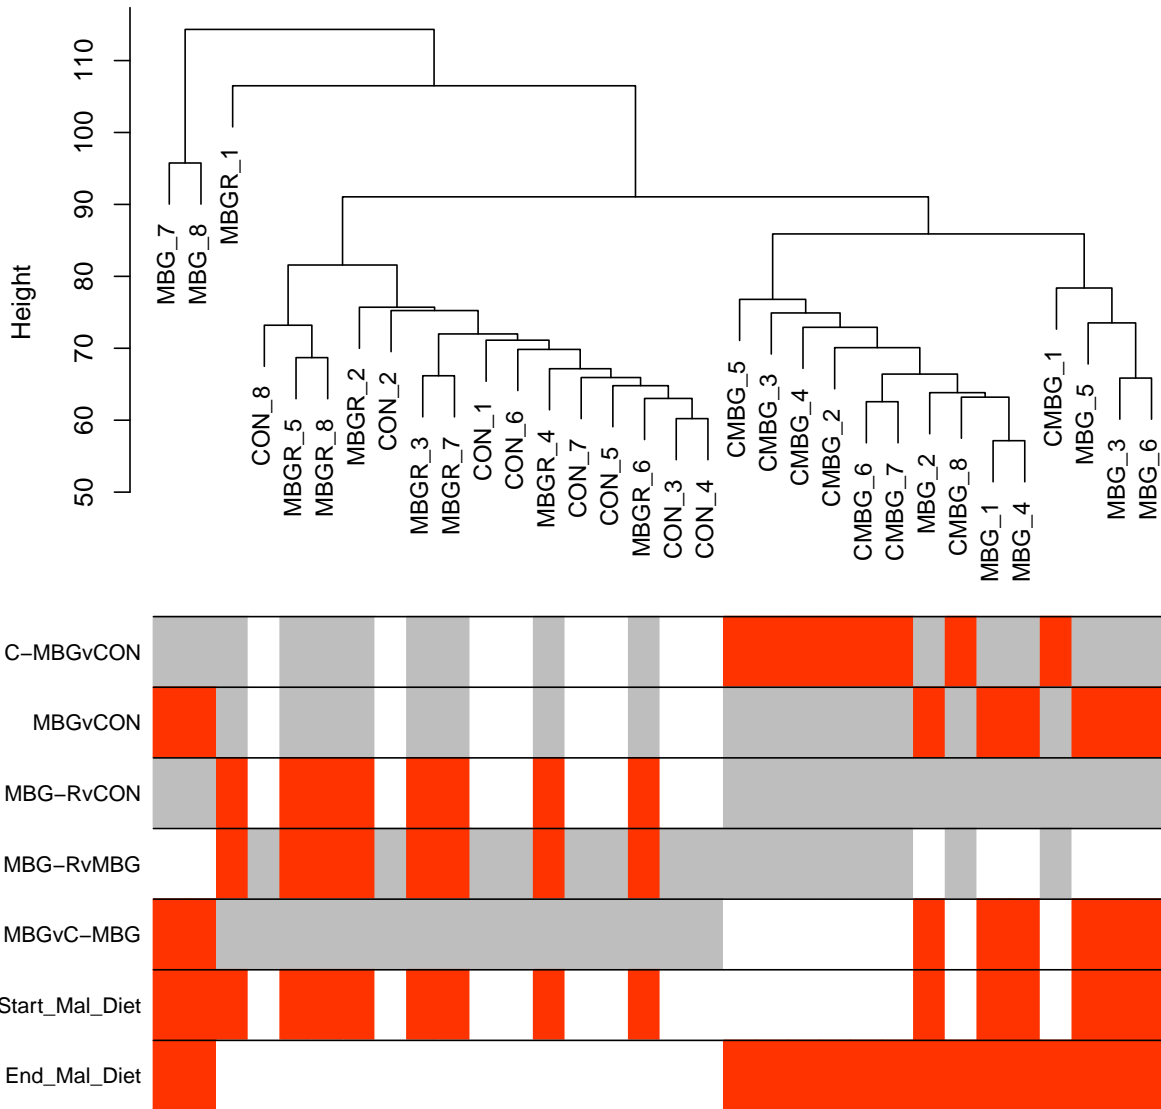

```
# Sample dendrogram tree with clinical traits (continuous)
sampleTree3 = hclust(dist(Metdata), method = "average")
# Convert traits to a color representation: white means low,
# red means high, grey means missing entry
traitColors = numbers2colors(dataTraits2, signed = FALSE)
# Plot the sample dendrogram and the colors underneath.
plotDendroAndColors(sampleTree3, traitColors, groupLabels = names(dataTraits2),
  main = "Sample dendrogram and clinical trait heatmap")
```



## Sample dendrogram and clinical trait heatmap

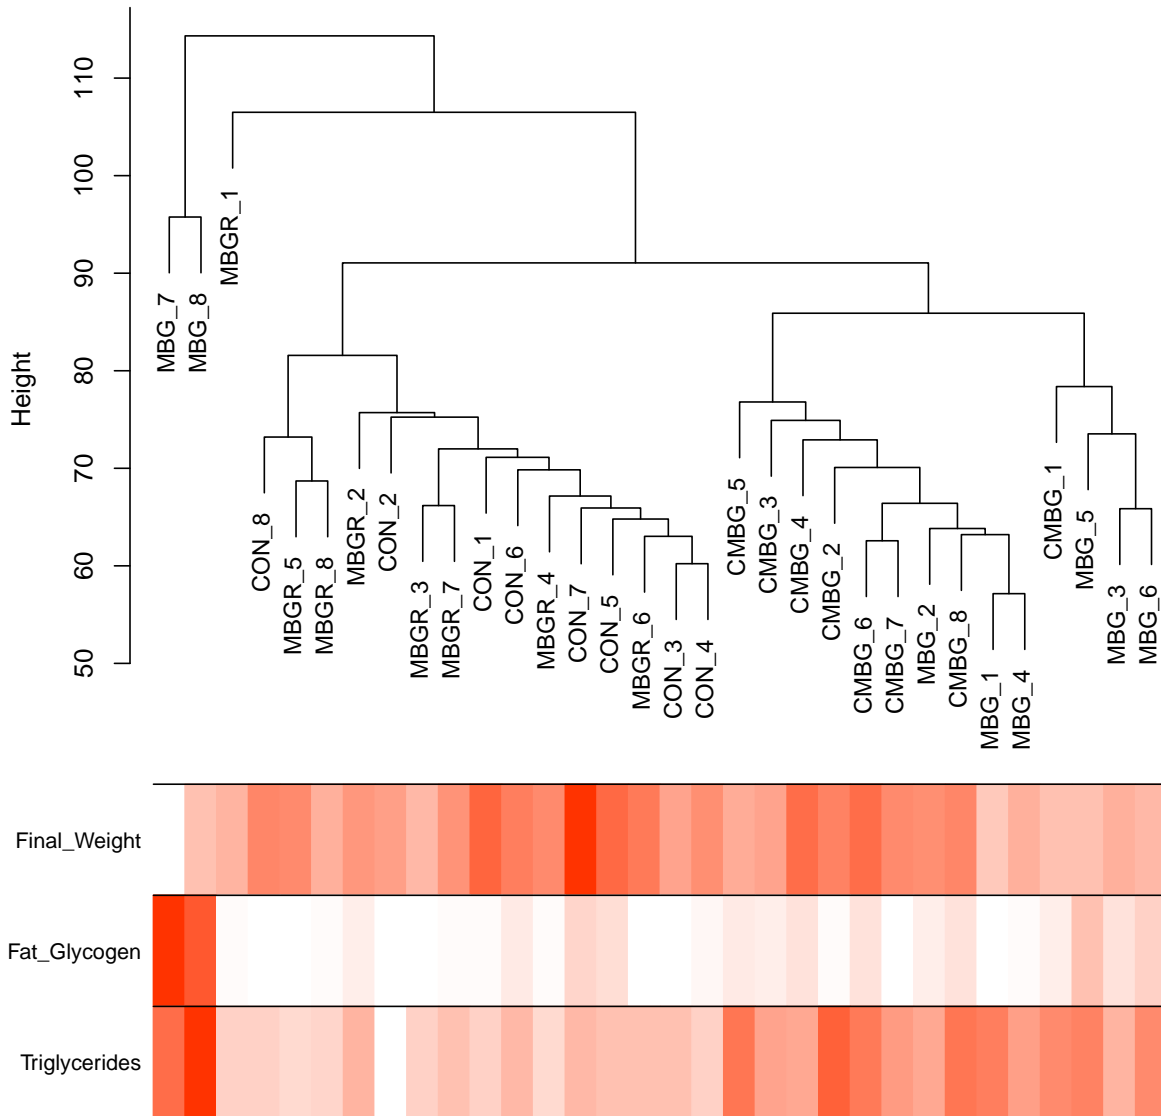

## Forming Network Clusters

```
## Picking soft threshold, using WGCNA tutorial power settings
powers = c(c(1:10), seq(from = 12, to = 20, by = 2))
sft = pickSoftThreshold(Metdata, powerVector = powers, verbose = 5)
```

```
## pickSoftThreshold: will use block size 4068.
## pickSoftThreshold: calculating connectivity for given powers...
## ..working on genes 1 through 4068 of 4068
## Power SFT.R.sq slope truncated.R.sq mean.k. median.k. max.k.
## 1 1 0.00129 -0.0693 0.572 909.00 903.000 1460.0
## 2 2 0.47900 -0.9520 0.705 329.00 298.000 762.0
```

```

## 3      3  0.65500 -1.2100      0.796 153.00  119.000  474.0
## 4      4  0.70700 -1.3300      0.840  82.60   54.400  326.0
## 5      5  0.74000 -1.3700      0.881  49.60   28.300  237.0
## 6      6  0.75900 -1.4000      0.908  32.10   15.700  179.0
## 7      7  0.76600 -1.4300      0.920  21.90    9.130  138.0
## 8      8  0.78600 -1.4300      0.936  15.70    5.670  109.0
## 9      9  0.79500 -1.4300      0.942  11.60    3.710   88.0
## 10     10 0.80900 -1.4100      0.951   8.81    2.480   71.8
## 11     12 0.83700 -1.4100      0.961   5.48    1.290   50.6
## 12     14 0.84000 -1.3900      0.953   3.68    0.719   37.0
## 13     16 0.88000 -1.3100      0.960   2.62    0.395   27.9
## 14     18 0.94800 -1.2500      0.996   1.95    0.234   22.4
## 15     20 0.93300 -1.3600      0.994   1.52    0.144   21.1

```

```

# Plot Scale Independence and Mean Connectivity
par(mfrow = c(1, 2))
cex1 = 0.9
### Scale-free topology fit index as a function of the
### soft-thresholding power
plot(sft$fitIndices[, 1], -sign(sft$fitIndices[, 3]) * sft$fitIndices[,
  2], xlab = "Soft Threshold (power)", ylab = "Scale Free Topology Model Fit, signed R^2",
  type = "n", main = paste("Scale independence"))
text(sft$fitIndices[, 1], -sign(sft$fitIndices[, 3]) * sft$fitIndices[,
  2], labels = powers, cex = cex1, col = "blue")
# this line corresponds to using an R^2 cut-off of h
abline(h = 0.9, col = "red")
# Mean connectivity as a function of the soft-thresholding
# power
plot(sft$fitIndices[, 1], sft$fitIndices[, 5], xlab = "Soft Threshold (power)",
  ylab = "Mean Connectivity", type = "n", main = paste("Mean connectivity"))
text(sft$fitIndices[, 1], sft$fitIndices[, 5], labels = powers,
  cex = cex1, col = "blue")

```

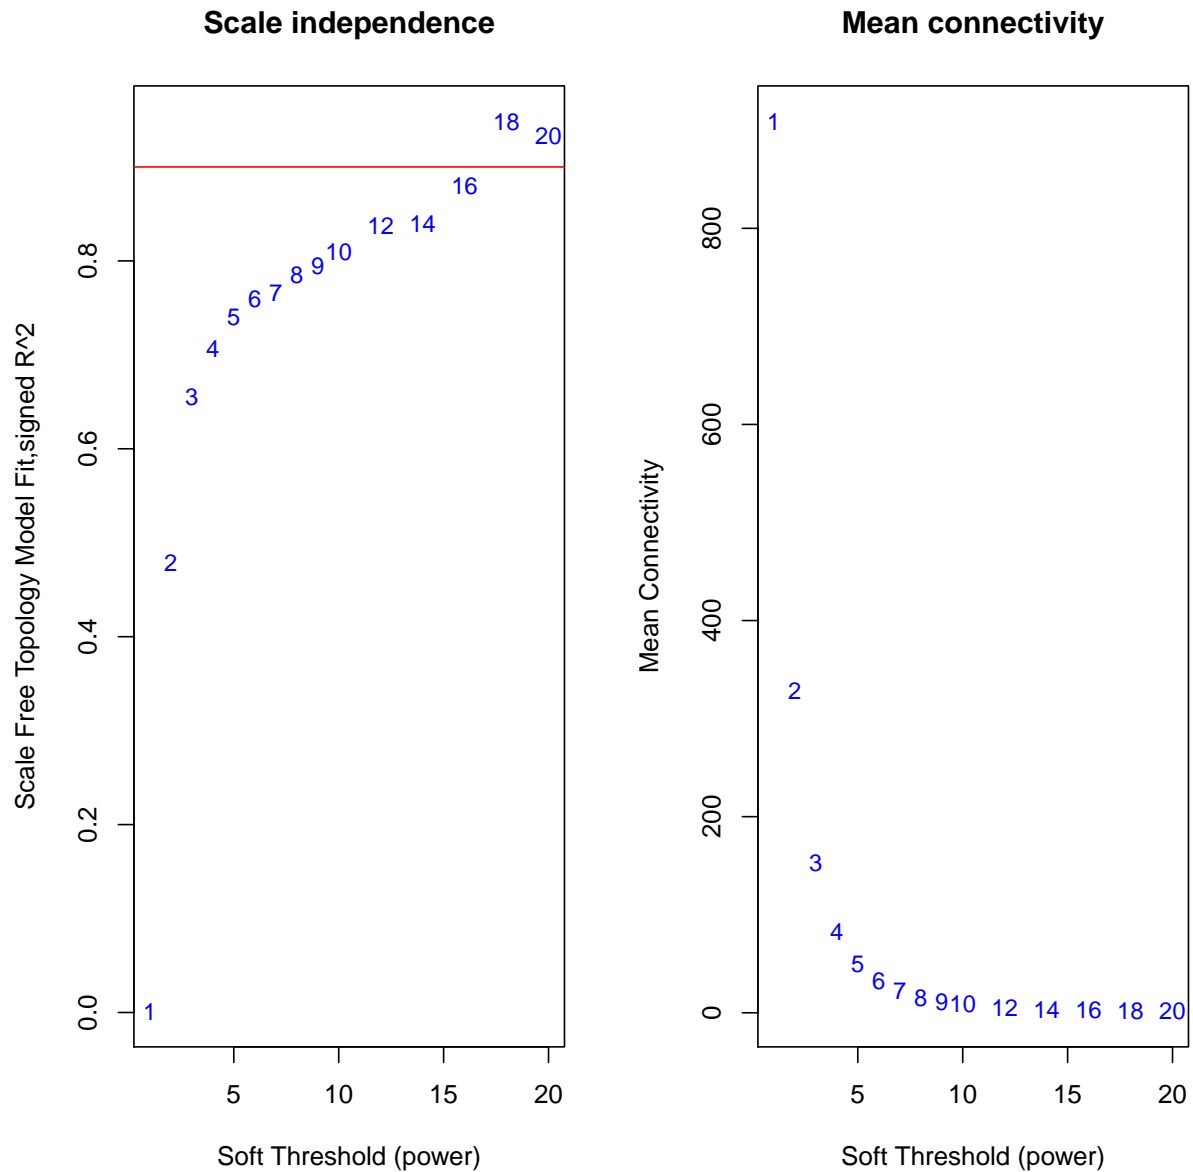

### Creating modules based on threshold power

```
datExpr = Metdata
net = blockwiseModules(datExpr, power = 12, mergeCutHeight = 0.3,
  corType = "bicor", TOMType = "signed", minModuleSize = 5,
  reassignThreshold = 0, numericLabels = TRUE, saveTOMs = TRUE,
  minKMEtoStay = 0.5, minCoreKME = 0.5, minCoreKMESize = 3,
  saveTOMFileBase = "Metabolites_43 TOM", deepSplit = 2, verbose = 3)
```

```
## Calculating module eigengenes block-wise from all genes
## Flagging genes and samples with too many missing values...
## ..step 1
```

```

## ..Working on block 1 .
##   TOM calculation: adjacency..
##   ..will use 8 parallel threads.
##   Fraction of slow calculations: 0.000000
##   ..connectivity..
##   ..matrix multiplication (system BLAS)..
##   ..normalization..
##   ..done.
##   ..saving TOM for block 1 into file Metabolites_43 TOM-block.1.RData
##   ....clustering..
##   ....detecting modules..
##   ....calculating module eigengenes..
##   ....checking kME in modules..
##     ..removing 1 genes from module 1 because their KME is too low.
##     ..removing 1 genes from module 8 because their KME is too low.
##     ..removing 1 genes from module 12 because their KME is too low.
##     ..removing 1 genes from module 47 because their KME is too low.
##     ..removing 1 genes from module 82 because their KME is too low.
##     ..removing 1 genes from module 94 because their KME is too low.
##     ..removing 1 genes from module 105 because their KME is too low.
##     ..removing 1 genes from module 115 because their KME is too low.
##   ..merging modules that are too close..
##     mergeCloseModules: Merging modules whose distance is less than 0.3
##     Calculating new MEs...

```

The number of modules and metabolites within / 0 = unclustered modules

```
table(net$colors)
```

```

##
##   0   1   2   3   4   5   6   7   8   9  10  11  12  13  14  15
## 1495 661 356 332 288 248  84  47  47  38  36  35  33  28  20  16
##   16  17  18  19  20  21  22  23  24  25  26  27  28  29  30  31
##   15  15  13  13  12  12  11  10  10   9   9   9   9   9   8   8
##   32  33  34  35  36  37  38  39  40  41  42  43  44  45  46  47
##    8   8   8   8   8   8   7   7   7   7   7   6   6   6   6   5
##   48  49  50  51
##    5   5   5   5

```

Plot Dendrogram

```

# Convert labels to colors for plotting
mergedColors = labels2colors(net$colors)
# Plot the dendrogram with module colors below
plotDendroAndColors(net$dendrograms[[1]], mergedColors[net$blockGenes[[1]]],
  "Module colors", dendroLabels = FALSE, hang = 0.03, addGuide = TRUE,
  guideHang = 0.05)

```

## Cluster Dendrogram

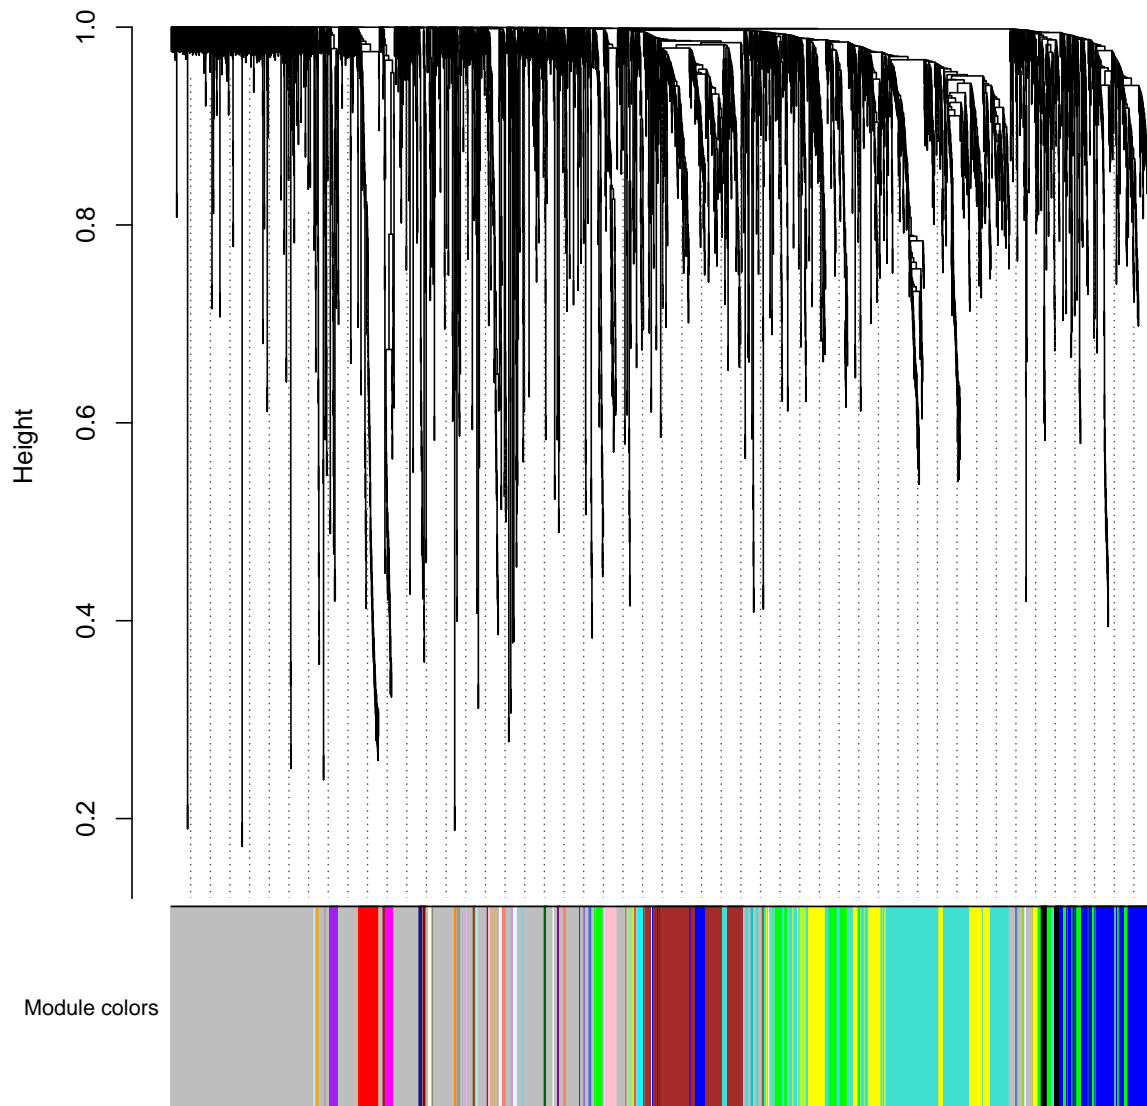

### Module and module eigengene assignment

```
moduleLabels = net$colors
moduleColors = labels2colors(net$colors)
MEs = net$MEs
geneTree = net$dendrograms[[1]]
```

### Relating modules to clinical traits

```

# Relating modules to clinical traits Define numbers of genes
# and samples
nGenes = ncol(datExpr)
nSamples = nrow(datExpr)
# Recalculate MEs with color labels Eigengene placement along
# the PC1 axis of the modules correlated to clinical trait of
# choice
MEs0 = moduleEigengenes(datExpr, moduleColors)$eigengenes
MEs = orderMEs(MEs0)

# Correlating to trait (spearman)
moduleTraitCor = cor(MEs, dataTraits2, use = "p", method = c("spearman"))
moduleTraitPvalue = corPvalueStudent(moduleTraitCor, nSamples)

# FDR correcting Pvalues
moduleTraitPvalue_fdr <- as.data.frame(moduleTraitPvalue)
head(moduleTraitPvalue_fdr)
moduleTraitPvalue_fdr$Final_Weight <- p.adjust(moduleTraitPvalue_fdr$Final_Weight,
method = "fdr")
moduleTraitPvalue_fdr$Fat_Glycogen <- p.adjust(moduleTraitPvalue_fdr$Fat_Glycogen,
method = "fdr")
moduleTraitPvalue_fdr$Triglycerides <- p.adjust(moduleTraitPvalue_fdr$Triglycerides,
method = "fdr")
moduleTraitPvalue_fdr <- as.matrix(moduleTraitPvalue_fdr)

# Plotting the spearman correlations of your modules with the
# clinical trait and apply FDR corrected p-value. Will
# display correlations and their p-values
textMatrix = paste(signif(moduleTraitCor, 2), "\n(", signif(moduleTraitPvalue_fdr,
1), ")", sep = "")
dim(textMatrix) = dim(moduleTraitCor)
par(mar = c(6, 8.5, 3, 3))
# Display the correlation values within a heatmap plot
labeledHeatmap(Matrix = moduleTraitCor, xLabels = names(dataTraits2),
yLabels = names(MEs), ySymbols = names(MEs), colorLabels = FALSE,
colors = blueWhiteRed(50), textMatrix = textMatrix, setStdMargins = FALSE,
cex.text = 0.3, zlim = c(-1, 1), main = paste("Module-clinical trait relationships"))

```

### Module-clinical trait relationships

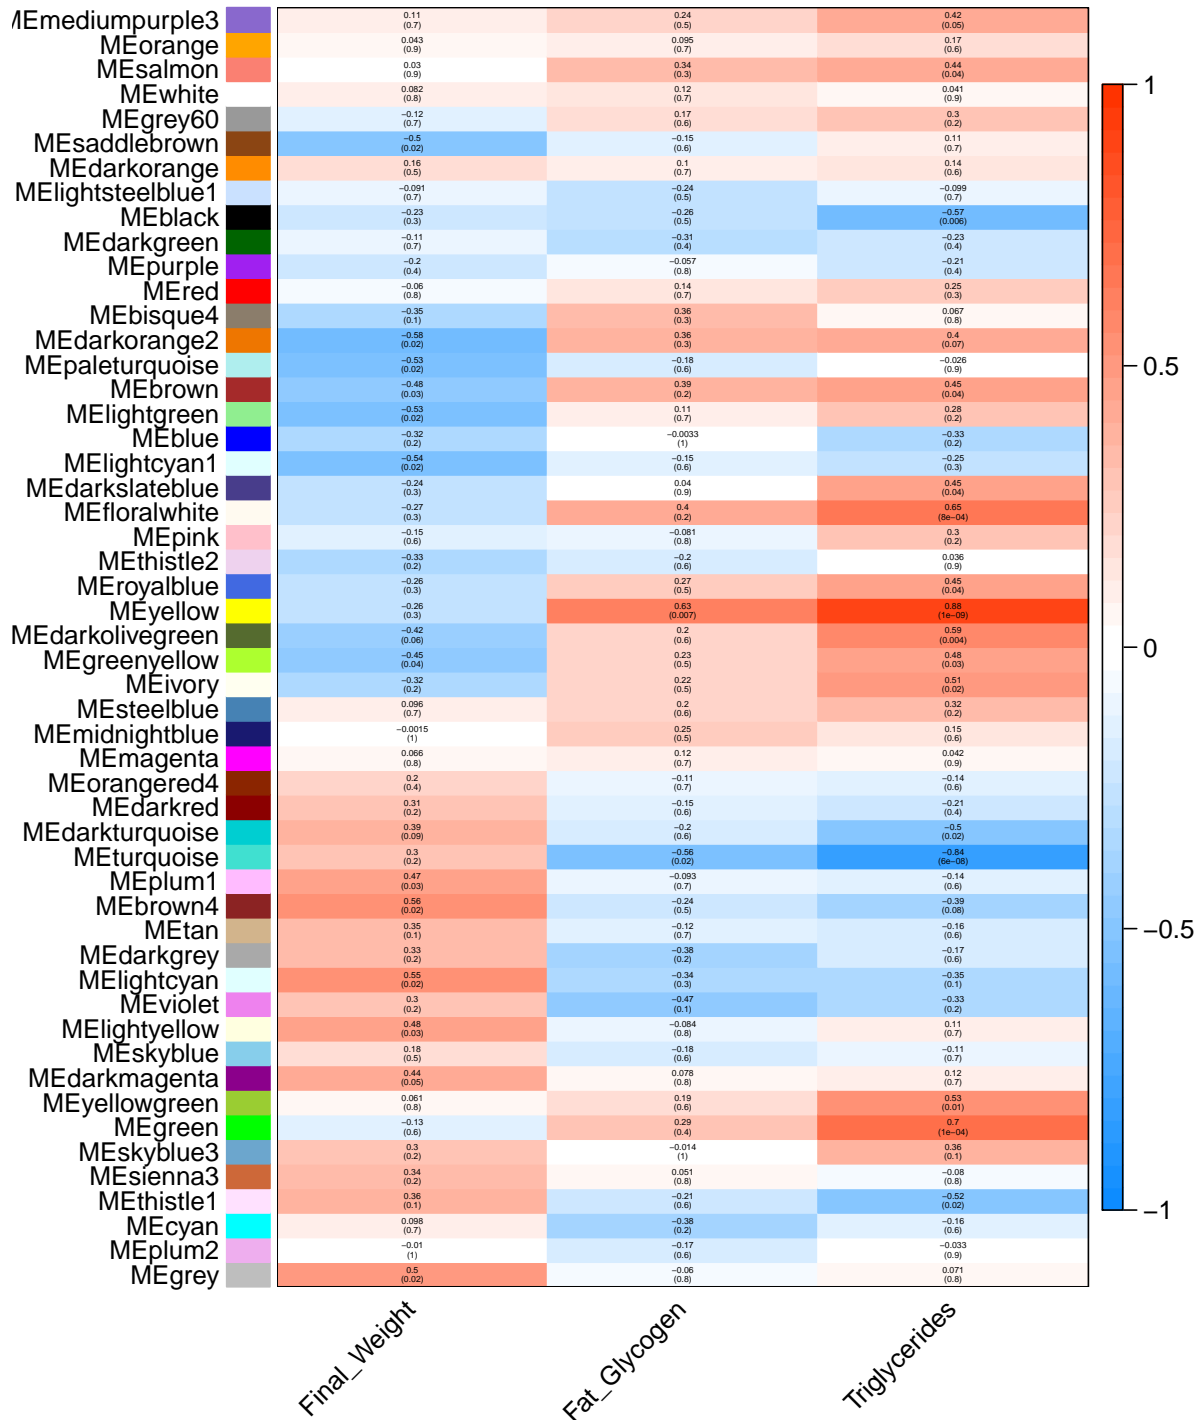

## Visualization 1: correlation plot with sizes, colors, and statistics

```
corrplot(moduleTraitCor, is.corr = FALSE, order = "original",
  method = "circle", tl.col = "black", cl.cex = 0.8, outline = TRUE,
  cl.ratio = 1, cl.align.text = "l", cl.offset = 0.5, tl.cex = 0.8,
  tl.pos = "lt", rect.lwd = 6, p.mat = moduleTraitPvalue_fdr,
  sig.level = 0.05, insig = "label_sig", col = colorRampPalette(c("navy",
  "white", "darkred"))(200))
```



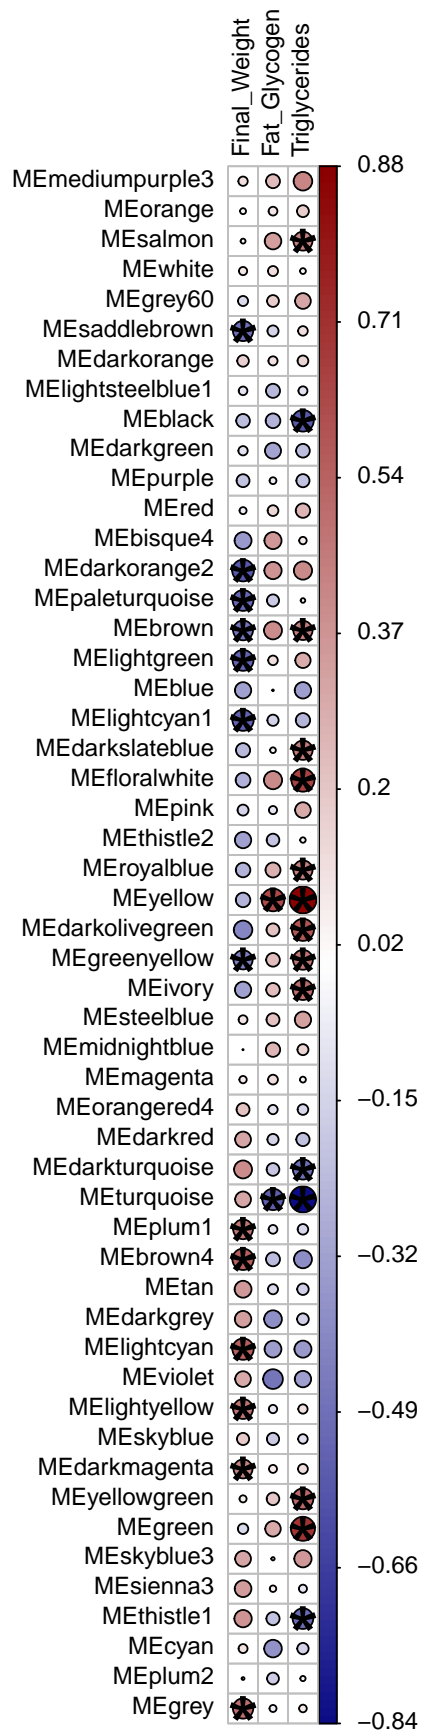

## Relating modules to groups

```
# Correlating to group using binary table (spearman)
moduleTraitCorB = cor(MEs, groupTraits, use = "p", method = c("spearman"))
moduleTraitPvalueB = corPvalueStudent(moduleTraitCorB, nSamples)

# FDR correcting Pvalues
moduleTraitPvalue_fdrB <- as.data.frame(moduleTraitPvalueB)
head(moduleTraitPvalue_fdrB)
moduleTraitPvalue_fdrB$`C-MBGvCON` <- p.adjust(moduleTraitPvalue_fdrB$`C-MBGvCON`,
  method = "fdr")
moduleTraitPvalue_fdrB$MBGvCON <- p.adjust(moduleTraitPvalue_fdrB$MBGvCON,
  method = "fdr")
moduleTraitPvalue_fdrB$`MBG-RvCON` <- p.adjust(moduleTraitPvalue_fdrB$`MBG-RvCON`,
  method = "fdr")
moduleTraitPvalue_fdrB$`MBG-RvMBG` <- p.adjust(moduleTraitPvalue_fdrB$`MBG-RvMBG`,
  method = "fdr")
moduleTraitPvalue_fdrB$`MBGvC-MBG` <- p.adjust(moduleTraitPvalue_fdrB$`MBGvC-MBG`,
  method = "fdr")
moduleTraitPvalue_fdrB$Start_Mal_Diet <- p.adjust(moduleTraitPvalue_fdrB$Start_Mal_Diet,
  method = "fdr")
moduleTraitPvalue_fdrB$End_Mal_Diet <- p.adjust(moduleTraitPvalue_fdrB$End_Mal_Diet,
  method = "fdr")
moduleTraitPvalue_fdrB <- as.matrix(moduleTraitPvalue_fdrB)

# Plotting the spearman correlations of your modules with the
# clinical trait and apply FDR corrected p-value. Will
# display correlations and their p-values
textMatrix = paste(signif(moduleTraitCorB, 2), "\n(", signif(moduleTraitPvalue_fdrB,
  1), ")", sep = "")
dim(textMatrix) = dim(moduleTraitCorB)
par(mar = c(6, 8.5, 3, 3))
# Display the correlation values within a heatmap plot
labeledHeatmap(Matrix = moduleTraitCorB, xLabels = names(groupTraits),
  yLabels = names(MEs), ySymbols = names(MEs), colorLabels = FALSE,
  colors = blueWhiteRed(50), textMatrix = textMatrix, setStdMargins = FALSE,
  cex.text = 0.3, zlim = c(-1, 1), main = paste("Module-group relationships"))
```

## Module-group relationships

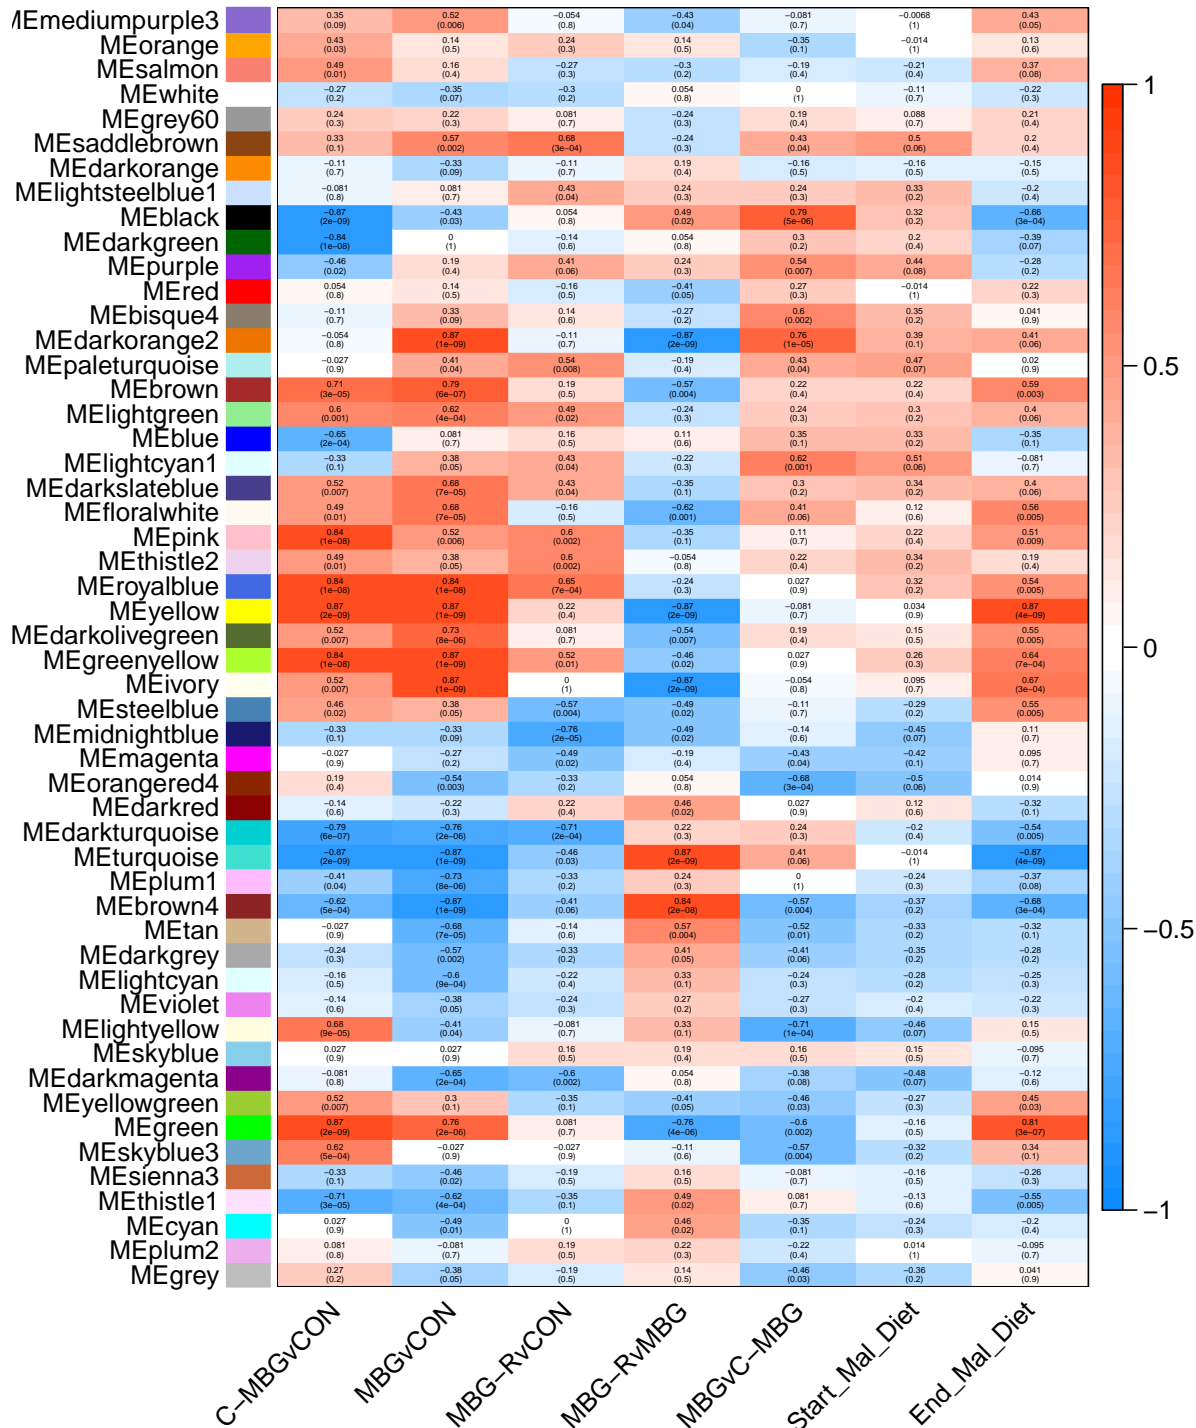

## Visualization 2: correlation plot with sizes, colors, and statistics

```
corrplot(moduleTraitCorB, is.corr = FALSE, order = "original",
  method = "circle", tl.col = "black", cl.cex = 0.8, outline = TRUE,
  cl.ratio = 1, cl.align.text = "l", cl.offset = 0.5, tl.cex = 0.8,
  tl.pos = "lt", rect.lwd = 6, p.mat = moduleTraitPvalue_fdrB,
  sig.level = 0.05, insig = "label_sig", col = colorRampPalette(c("navy",
  "white", "darkred"))(200))
```

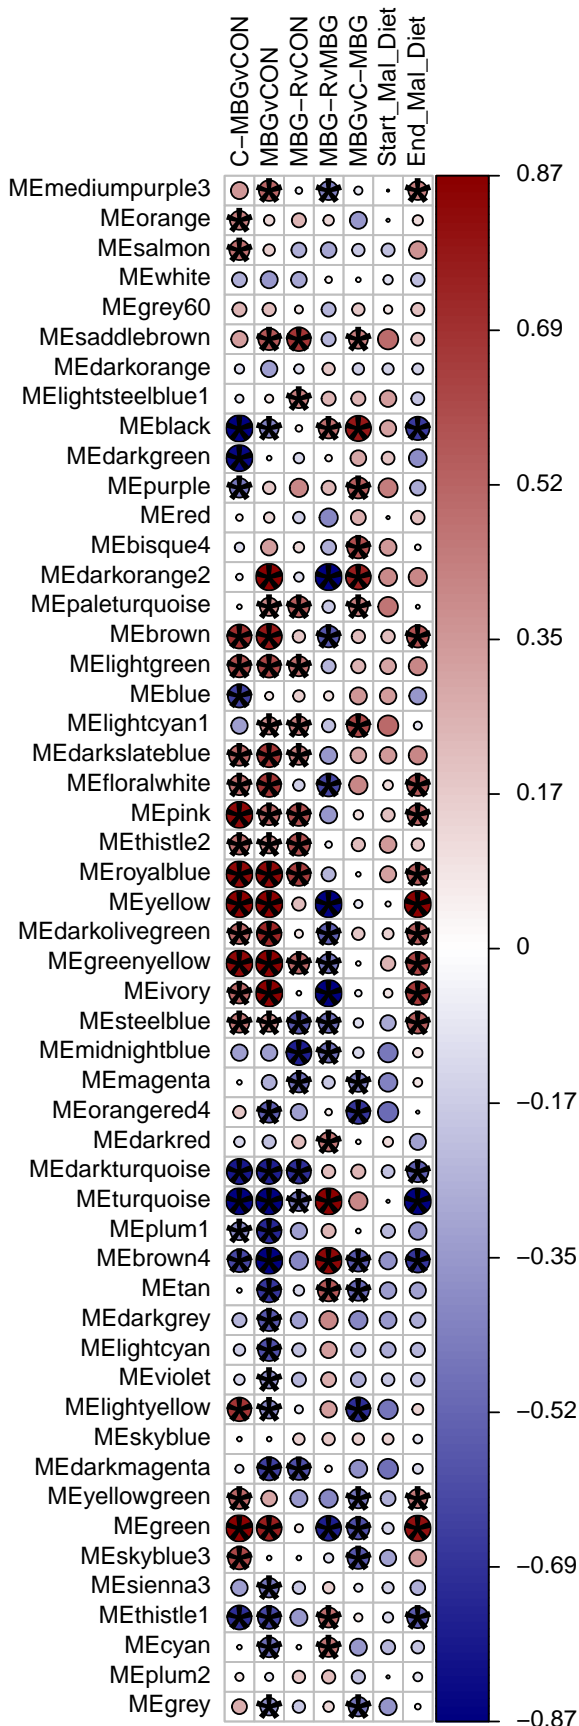

To obtain a list of metabolites within each module...also correlates module members with trait of choice / Useful to analyse red, yellow, and turquoise modules

```
Fat_Glycogen = as.data.frame(dataTraits2$Fat_Glycogen)
names(Fat_Glycogen) = "Fat_Glycogen"
# names (colors) of the modules
modNames = substring(names(MEs), 3)
# define module membership of each metabolite and its
# significance
geneModuleMembership = as.data.frame(cor(datExpr, MEs, use = "p"))
MMPvalue = as.data.frame(corPvalueStudent(as.matrix(geneModuleMembership),
  nSamples))
names(geneModuleMembership) = paste("MM", modNames, sep = "")
names(MMPvalue) = paste("p.MM", modNames, sep = "")

# correlating each metabolite to the trait
geneTraitSignificance = as.data.frame(cor(datExpr, Fat_Glycogen,
  use = "p", method = c("spearman")))
GSPvalue = as.data.frame(corPvalueStudent(as.matrix(geneTraitSignificance),
  nSamples))
names(geneTraitSignificance) = paste("GS.", names(Fat_Glycogen),
  sep = "")
names(GSPvalue) = paste("p.GS.", names(Fat_Glycogen), sep = "")

# combining correlation, significance, and membership with
# metabolites and modules
Metabolite = names(datExpr)

MetInfo = data.frame(Metabolite = Metabolite, moduleColor = moduleColors,
  geneTraitSignificance, GSPvalue)
# order modules by significance for Atopy
modOrder = order(-abs(cor(MEs, Fat_Glycogen, use = "p")))

# Add module membership information in the chosen order
for (mod in 1:ncol(geneModuleMembership)) {
  oldNames = names(MetInfo)
  MetInfo = data.frame(MetInfo, geneModuleMembership[, modOrder[mod]],
    MMPvalue[, modOrder[mod]])
  names(MetInfo) = c(oldNames, paste("MM.", modNames[modOrder[mod]],
    sep = ""), paste("p.MM.", modNames[modOrder[mod]], sep = ""))
}

# Order the genes in the geneInfo variable first by module
# color, then by geneTraitSignificance
MetOrder = order(MetInfo$moduleColor, -abs(MetInfo$GS.Fat_Glycogen))
MetInfo = MetInfo[MetOrder, ]

# This table shows who is clustering in each module and how
# they relate to the trait.
write.csv(MetInfo, file = "MetInfo_FG_spearman.csv")

# This table contains the MEs and the colors
write.csv(MEs, file = "Modular Eigengene")
```
